# Supplementary material for: Preparation of porous ammonium dinitramide crystals and efficient catalytic decomposition of corresponding iron oxide assembled composite particles
Source: Royal Society of Chemistry journal article supplement (doi:10.1039/d4ce01034e), 2025-01-01
Supplement: d4ce01034e1.pdf [file d4ce01034e1.pdf]

## ARTICLE

### Supporting information

#### Preparation of porous ammonium dinitramide crystals and efficient catalytic decomposition of corresponding iron oxide assembled composite particles

Yuanlu Cui<sup>a</sup>, Chong Teng<sup>a</sup>, Jingjing Li<sup>b</sup>, Zheng Huo<sup>a</sup>, Kai Xin<sup>a</sup>, Jinxian Zhai<sup>a</sup>, Rongjie Yang<sup>a,\*</sup>

<sup>a</sup>School of Materials Science and Engineering, Beijing Institute of Technology, Beijing 100081, China.

<sup>b</sup>China Ordnance Industrial Standardization Research Institute, Beijing 100089, China.

### Table of Contents

**Figure S1** Diffraction results of spherical ADN single crystals with particle sizes larger than 300 $\mu\text{m}$ .

**Figure S2** XRD diffraction pattern of  $\text{Fe}_2\text{O}_3$ , ADN,  $\text{ADN}+\text{Fe}_2\text{O}_3$  and  $\text{ADN}@\text{Fe}_2\text{O}_3$ .

**Figure S3** DSC curves of ADN,  $\text{ADN}+\text{Fe}_2\text{O}_3$  and  $\text{ADN}@\text{Fe}_2\text{O}_3$  under different heating rates.

**Figure S4** Fitting curves of  $\lg \beta$  versus  $\frac{1}{T}$  using Ozawa formula : (a) ADN; (b)  $\text{ADN}+\text{Fe}_2\text{O}_3$ ; (c)  $\text{ADN}@\text{Fe}_2\text{O}_3$ ; (d) Global apparent activation energy of different samples.

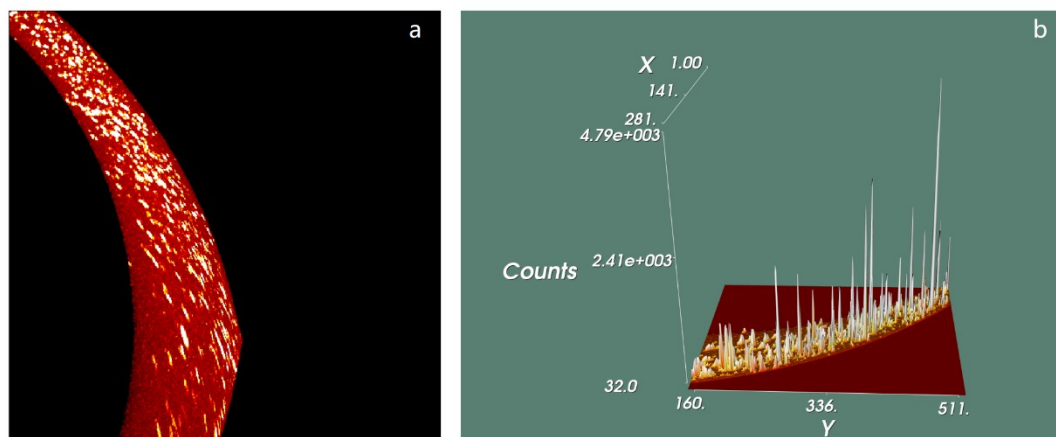

Figure S1 Diffraction results of spherical ADN single crystals with particle sizes larger than 300 $\mu\text{m}$ . a: diffraction ring pattern b: 3D mode view.

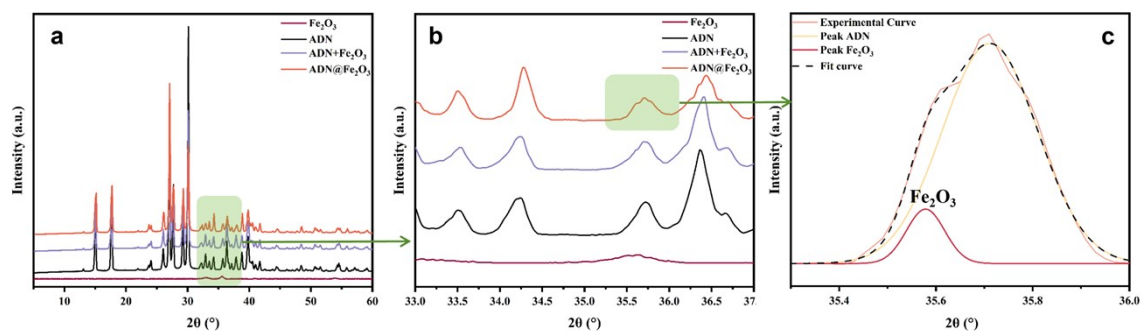

Figure S2 XRD diffraction pattern of  $\text{Fe}_2\text{O}_3$ , ADN,  $\text{ADN}+\text{Fe}_2\text{O}_3$  and  $\text{ADN}@\text{Fe}_2\text{O}_3$ .

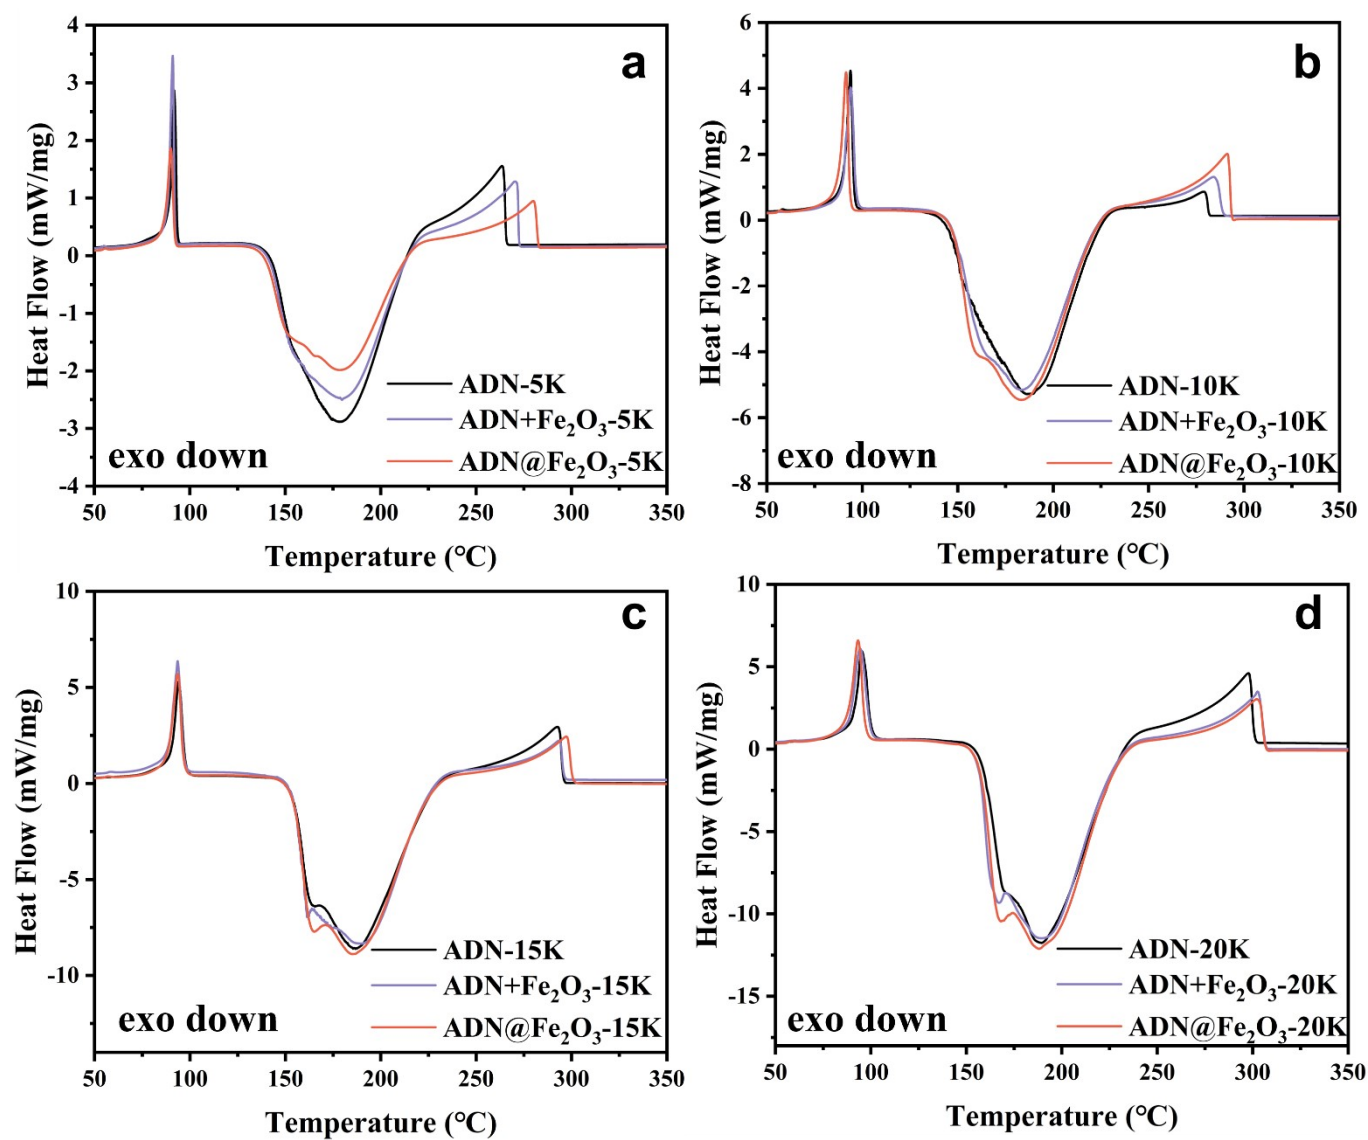

Figure S3 DSC curves of ADN, ADN+Fe<sub>2</sub>O<sub>3</sub> and ADN@Fe<sub>2</sub>O<sub>3</sub> under different heating rates.

Using the Ozawa method to process the results of thermal decomposition and obtain the changes in the  $E_a$  of the sample decomposition process is also a commonly used thermal decomposition analysis method. The Ozawa formula is as follows:

$$\lg \beta = \lg \left[ \frac{AE}{RG(\alpha)} \right] - 2.315 - 0.4567 \frac{E_a}{RT}$$

In the equation,  $\alpha$  represents the conversion rate,  $T$  is the corresponding temperature for this conversion rate,  $\beta$  is the heating rate,  $A$  is the pre-exponential factor,  $E_a$  is the global apparent activation energy, and  $R$  is the molar gas constant,  $G(\alpha)$  depends on the mechanism function. The least squares method is used for linear fitting of ADN, ADN+Fe<sub>2</sub>O<sub>3</sub> and ADN@Fe<sub>2</sub>O<sub>3</sub> results under different conversion rates, as shown in Figure. S4.

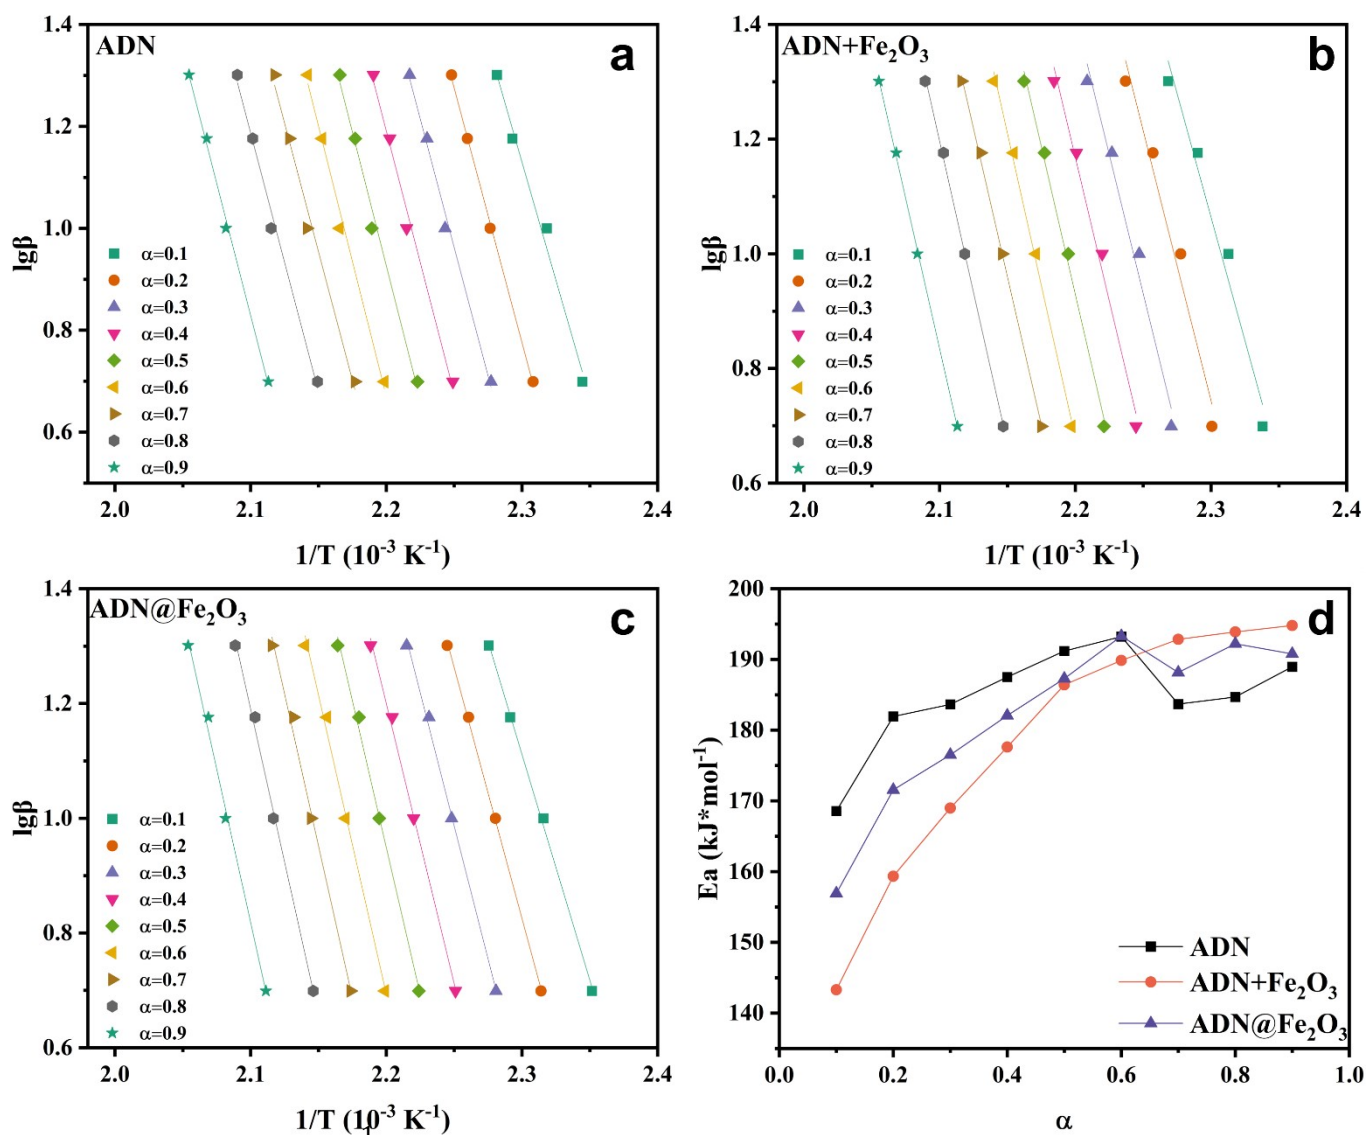

Figure S4 Fitting curves of  $\lg \beta$  versus  $1/T$  using Ozawa formula :(a) ADN; (b) ADN+Fe<sub>2</sub>O<sub>3</sub>; (c) ADN@Fe<sub>2</sub>O<sub>3</sub>; (d) Global apparent activation energy of different samples.
